# Supplementary material for: The Back Muscle Surface Electromyography-Based Fatigue Index: A Digital Biomarker of Human Neuromuscular Aging?
Source: MDPI journal article supplement (doi:10.3390/bioengineering10030300), 2023-02-27

**Table suppl S1.** Results of the RMS-EMG from 221 individuals with cLBP who performed the cyclic submaximum back exercise. For these 221 persons a fitted EMG dataset was available on at least one test day, and the biomechanical variables of test performance were comparable between age groups. Note that P-values were adjusted for multiple comparisons (3 electrode pairs, 5 comparisons) using Bonferroni correction. A  $p < 0.01$  was considered significant. Please also note that changes of the RMS-SEMG value during the exercise and normalized by the onset value are significant with  $p < 0.0025$  and herein marked by “\*”. L5 refers to the multifidus, L2 to the longissimus, and L1 to the iliocostalis recording sites.

| Electrode level                     | Mean (SE)     |               |              |               | Linear mixed effects model |          |              |          |                 |              |                 |                 |
|-------------------------------------|---------------|---------------|--------------|---------------|----------------------------|----------|--------------|----------|-----------------|--------------|-----------------|-----------------|
|                                     | <50yrs        | >50yrs        | Males        | Females       | age<br>t; p                | age<br>d | sex<br>t; p  | sex<br>d | ageXsex<br>t; p | ageXsex<br>d | day1vs2<br>t; p | day1vs3<br>t; p |
| <u>Onsets</u>                       |               |               |              |               |                            |          |              |          |                 |              |                 |                 |
| All                                 | 1.3 (0.02)    | 1.3 (0.04)    | 1.28 (0.02)  | 1.23 (0.04)   | 0.75; 0.34                 | 0.10     | -0.34; 0.68  | 0.05     | -0.61; 0.53     | 0.08         | -2.24; 0.045    | 0.23; 0.70      |
| L5                                  | 1.3 (0.03)    | 1.2 (0.11)    | 1.30 (0.03)  | 1.13 (0.11)   | 0.10; 0.83                 | 0.01     | -0.59; 0.22  | 0.08     | -0.56; 0.54     | 0.07         | -1.68; 0.13     | 0.24; 0.63      |
| L2                                  | 1.3 (0.02)    | 1.3 (0.04)    | 1.32 (0.03)  | 1.30 (0.04)   | 1.33; 0.13                 | 0.18     | 0.08; 0.93   | 0.01     | -0.69; 0.49     | 0.10         | -1.87; 0.10     | -1.35; 0.19     |
| L1                                  | 1.2 (0.02)    | 1.3 (0.02)    | 1.23 (0.02)  | 1.25 (0.02)   | 0.62; 0.53                 | 0.08     | 0.20; 0.85   | 0.03     | 0.42; 0.68      | 0.06         | -1.32; 0.18     | 1.75; 0.08      |
| m.n.                                | 0.9 (0.02)    | 0.8 (0.21)    | 0.97 (0.02)  | 0.73 (0.20)   | 0.21; 0.24                 | 0.02     | -0.07; 0.71  | 0.01     | -1.06; 0.37     | 0.09         | -1.06; 0.37     | 0.11; 0.49      |
| <u>Changes normalized to Onsets</u> |               |               |              |               |                            |          |              |          |                 |              |                 |                 |
| All                                 | 0.23 (0.03)*  | 0.13 (0.02)*  | 0.23 (0.03)* | 0.14 (0.02)*  | -2.06; 0.043               | 0.27     | -1.91; 0.07  | 0.26     | 0.62; 0.52      | 0.08         | 1.14; 0.25      | 2.39; 0.009     |
| L5                                  | 0.20 (0.03)*  | 0.08 (0.05)   | 0.20 (0.03)* | 0.09 (0.05)   | -1.07; 0.14                | 0.14     | -0.94; 0.21  | 0.12     | -0.35; 0.71     | 0.05         | -0.24; 0.83     | 1.13; 0.047     |
| L2                                  | 0.23 (0.03)*  | 0.15 (0.03)*  | 0.23 (0.03)* | 0.15 (0.02)*  | -2.28; 0.032               | 0.31     | -2.18; 0.040 | 0.30     | 1.55; 0.11      | 0.21         | 1.46; 0.08      | 2.52; 0.026     |
| L1                                  | 0.26 (0.03)*  | 0.16 (0.02)*  | 0.25 (0.03)* | 0.17 (0.02)*  | -1.99; 0.07                | 0.26     | -1.81; 0.11  | 0.24     | 0.59; 0.54      | 0.08         | 2.08; 0.036     | 2.24; 0.025     |
| m.n.                                | -0.04 (0.03)  | -0.17 (0.09)  | -0.05 (0.03) | -0.15 (0.09)  | -0.28; 0.52                | 0.02     | -0.10; 0.82  | 0.01     | -0.83; 0.36     | 0.07         | -0.47; 0.68     | 0.77; 0.012     |
| un.imb.                             | 33.90 (1.62)  | 41.66 (2.62)  | 33.91 (1.63) | 41.16 (2.52)  | 0.13; 0.87                 | 0.02     | -0.06; 0.94  | 0.01     | 1.65; 0.09      | 0.22         | -1.76; 0.043    | 1.14; 0.31      |
| c.imb.                              | -14.61 (2.25) | -15.11 (3.36) | -6.77 (2.34) | -22.58 (3.12) | 2.04; 0.018                | 0.28     | -0.38; 0.63  | 0.05     | -2.63; 0.007    | 0.36         | 0.32; 0.69      | 0.29; 0.81      |

**m.n.**= most negative electrode; **un.imb.**= uncompensated imbalances; **c.imb.**= compensated imbalances; **All**= all electrode recording sites (L5, L2, and L1 pooled); **<50 yrs**; **>50yrs**= participants' age groups (in years); **SE**= Standard error; **p**=P-value; **t**=t-statistic; **d**=Cohen's d; n= number of participants for whom a full set of electrode recordings was available;  
 \* = significant change ( $p < 0.0025$  = Bonferroni corrected significance level for the 5 levels and 4 subgroups =  $0.05/20$ )

**Figure suppl. S1:** Graphic illustration of the Monte Carlo simulation considering different effect sizes.

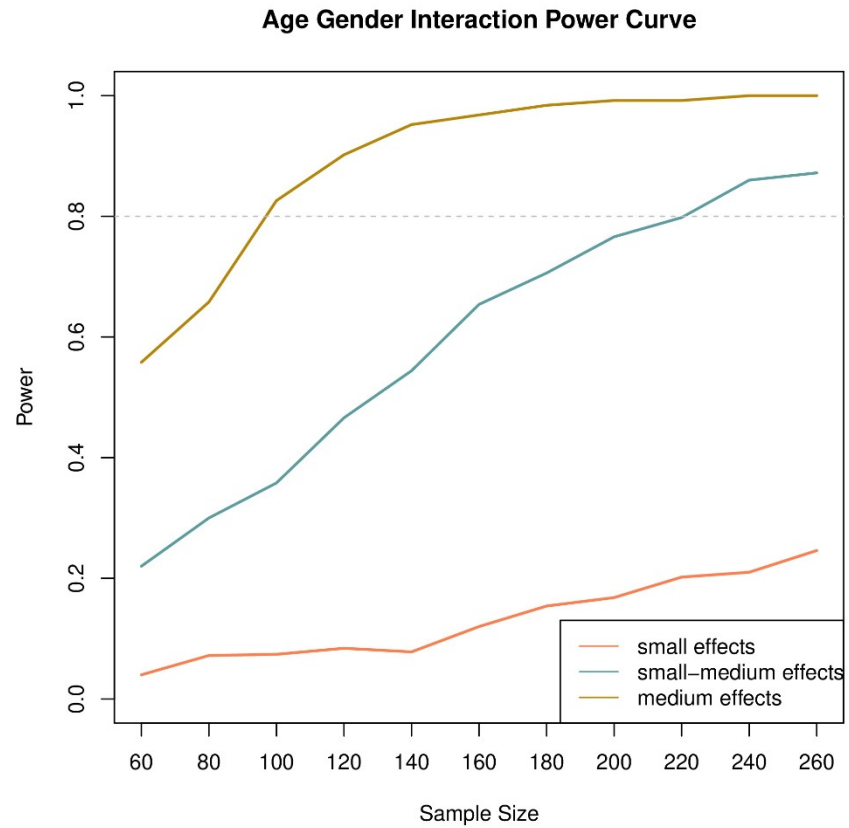

**Figure suppl. S2:** This figure shows the electrode recording site that revealed the most pronounced/ negative IMDF-SEMG fatigue slope normalized to the onset when the individual was retested on a second or third examination day. The arrows indicate how the electrode site depicting the most IMDF-SEMG fatigue changed between days.

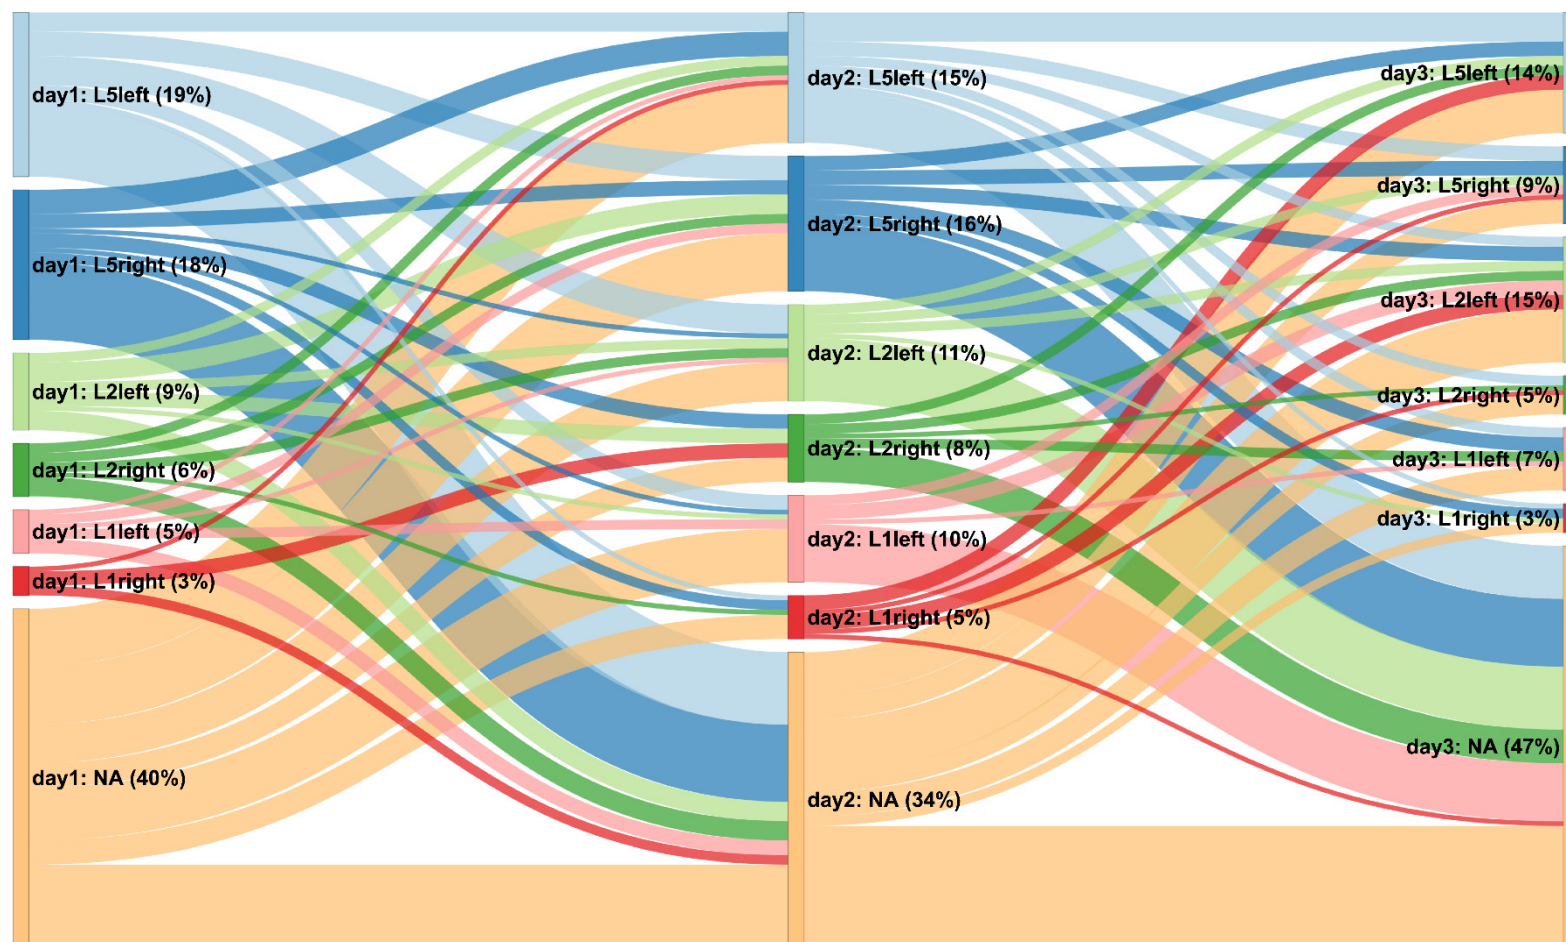

Supplement: s1 [file s1]
